# Supplementary material for: A gap existed between physicians’ perceptions and performance of pain, agitation-sedation and delirium assessments in Chinese intensive care units
Source: PubMed Central journal article supplement (PMC7905610; doi:10.1186/s12871-021-01286-w), 2021-02-25
Supplement: 12871_2021_1286_MOESM3_ESM.pdf [file 12871_2021_1286_MOESM3_ESM.pdf]

**A gap existed between physicians' perceptions and performance of pain,  
agitation-sedation and delirium assessments in Chinese intensive care units**

Kai Chen, Yan-Lin Yang, Hong-Liang Li, Dan Xiao, Yang Wang, Linlin Zhang, Jian-Xin Zhou

**Additional file 3:**

**Figure S1. Distribution of 20 recruited hospitals.**

**Figure S1.** Distribution of 20 recruited hospitals.

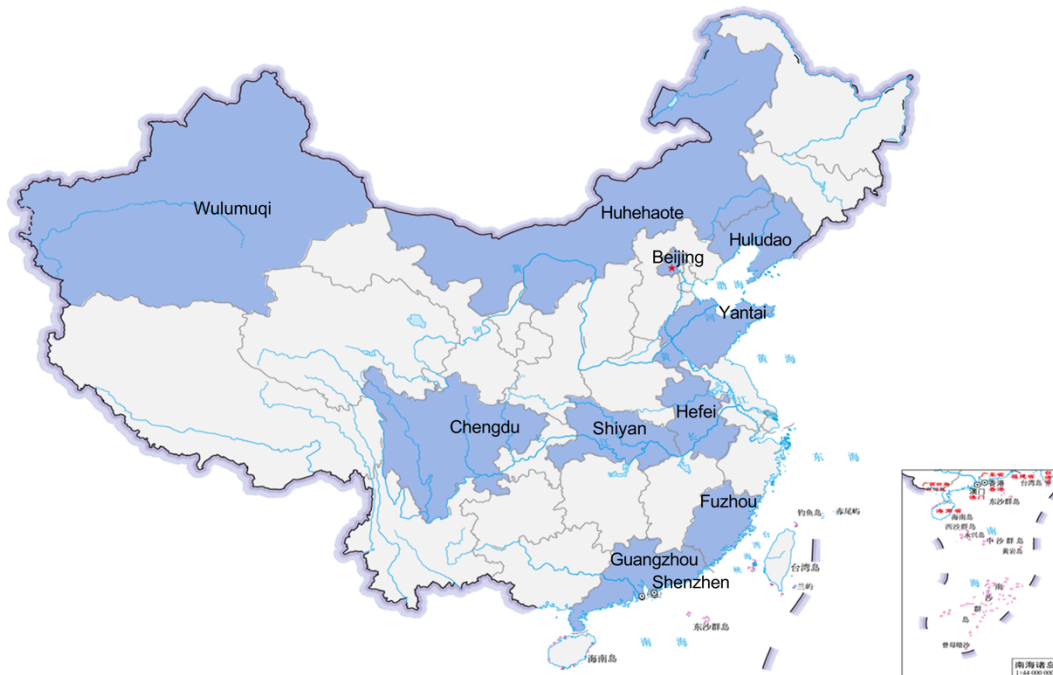

Twenty recruited hospitals are distributed to six Chinese administrative regions including WestNorth, North, EastNorth, East, South, and WestSouth.
