# Supplementary material for: A gap existed between physicians’ perceptions and performance of pain, agitation-sedation and delirium assessments in Chinese intensive care units
Source: PubMed Central journal article supplement (PMC7905610; doi:10.1186/s12871-021-01286-w), 2021-02-25
Supplement: 12871_2021_1286_MOESM4_ESM.pdf [file 12871_2021_1286_MOESM4_ESM.pdf]

**A gap existed between physicians' perceptions and performance of pain,  
agitation-sedation and delirium assessments in Chinese intensive care units**

Kai Chen, Yan-Lin Yang, Hong-Liang Li, Dan Xiao, Yang Wang, Linlin Zhang, Jian-Xin Zhou

**Additional file 4:**

**Analyses of the questionnaire surveys**

## Analysis for questionnaire survey

1. Do you have a written analgesia and sedation protocol?

Yes 63 (69.2%) No 28 (30.8%)

2. Do you routinely use a scale/score for **PAIN** assessment?

Yes 64 (70.3%) No 27 (29.7%)

If Yes, which pain scale/score is routinely used? (please tick one box)

|                                            |            |
|--------------------------------------------|------------|
| Visual Analogue Scale (VAS)                | 24 (37.5%) |
| Numerical Rating Scale (NRS)               | 12 (18.8%) |
| Verbal Rating Scale (VRS)                  | 9 (14.1)   |
| Faces Pain Scale (FPS)                     | 5 (7.8%)   |
| Behavioral Pain Scale                      | 3 (4.7%)   |
| Critical-care Pain Observation Tool (CPOT) | 11 (17.2%) |
| Others                                     | 0          |

3. Do you routinely use a scale/score for **AGITATION/SEDATION** assessment?

Yes 75 (82.4%) No 16 (17.6%)

If Yes, which agitation/sedation scale/score is routinely used? (please tick one box)

|                                          |            |
|------------------------------------------|------------|
| Richmond Agitation-Sedation Scale (RASS) | 55 (73.3%) |
| Sedation Agitation Scale (SAS)           | 13 (17.3%) |
| Rampy scale                              | 7 (9.3%)   |
| Motor Activity Assessment Scale (MAAS)   | 0          |
| Others                                   | 0          |

4. Do you use daily sedation interruption for sedated patients? (please tick one box)

|                 |            |
|-----------------|------------|
| Never           | 17 (18.7%) |
| Rarely          | 10 (11.0%) |
| Occasionally    | 11 (12.1%) |
| Frequently      | 22 (24.2%) |
| Very frequently | 31 (34.1%) |

5. Do you screen patients daily for delirium? (please tick one box)

Yes 48 (52.7%) No 43 (47.3%)

If Yes, which tool is routinely used? (please tick one box)

|                                                     |            |
|-----------------------------------------------------|------------|
| Confusion Assessment Method for the ICU (CAM-ICU)   | 43 (89.6%) |
| Intensive Care Delirium Screening Checklist (ICDSC) | 5 (10.4%)  |
| Others                                              | 0          |

6. Please indicate the three most frequently used opioids (please mark 1, 2, 3)

|           | First choice | Second choice | Third choice |
|-----------|--------------|---------------|--------------|
| Morphine: | 6 (6.6%)     | 9 (9.9%)      | 39 (42.9%)   |
| Fentanyl: | 34 (37.4%)   | 32 (35.2%)    | 15 (16.5%)   |

|               |            |            |            |
|---------------|------------|------------|------------|
| Sufentanil:   | 27 (29.7%) | 17 (18.7%) | 11 (12.1%) |
| Remifentanil: | 13 (14.3%) | 31 (34.1%) | 16 (17.6%) |
| Dezocine:     | 10 (11.0%) | 1 (1.1%)   | 4 (4.4%)   |
| Butorphanol:  | 1 (1.1%)   | 1 (1.1%)   | 6 (6.6%)   |

7. Please indicate the three most frequently used sedatives (please mark 1, 2, 3)

|                  | First choice | Second choice | Third choice |
|------------------|--------------|---------------|--------------|
| Midazolam:       | 50 (54.9%)   | 26 (28.6%)    | 15 (16.5%)   |
| Propofol:        | 18 (19.8%)   | 44 (48.4%)    | 27 (29.7%)   |
| Dexmedetomidine: | 23 (25.3%)   | 20 (22.0%)    | 36 (39.6%)   |
| Diazepam:        | 0            | 1 (1.1%)      | 13 (14.3%)   |

8. Do you use combined analgesia and sedation for your patients? (please tick one box)

|                 |            |
|-----------------|------------|
| Never           | 3 (3.3%)   |
| Rarely          | 14 (15.4%) |
| Occasionally    | 26 (28.6%) |
| Frequently      | 21 (23.1%) |
| Very frequently | 27 (29.7%) |

9. Do you use continuous infusion of neuromuscular blocking agent for sedated and ventilated patients? (please tick one box)

|                 |            |
|-----------------|------------|
| Never           | 28 (30.8%) |
| Rarely          | 57 (62.6%) |
| Occasionally    | 4 (4.4%)   |
| Frequently      | 1 (1.1%)   |
| Very frequently | 1 (1.1%)   |
